# Supplementary material for: The interesting and superior hydrogenation properties of potassium-doped LiNH2 and its ternary mixed-cationic amide
Source: Royal Society of Chemistry journal article supplement (doi:10.1039/c3ra40198g), 2013-01-01

(Supplementary information)

**The interesting and superior hydrogenation properties for the potassium-doped  $\text{LiNH}_2$  and their ternary mixed-cationic amide**

**Bao-Xia Dong, Yun-Lei Teng\*, Jun Ge, Liang Song and Shi-Yang Zhang**

*College of Chemistry and Chemical Engineering, Yangzhou University, Yangzhou,  
225002, P. R. China.*

**Experiments**

Lithium amide ( $\text{LiNH}_2$ ) (95%, Aldrich) and  $\text{H}_2$  (99.999%) were used for the following experiments. As additives, potassium hydride (KH) (99.5%, Aldrich) and potassium amide ( $\text{KNH}_2$ ) synthesized from the KH and  $\text{NH}_3$  were chosen. The additives were dispersed into the samples by the following mechanical ball-milling method. A weighed amount of  $\text{LiNH}_2$ , together with 30 steel balls (6 mm in diameter) and each additive, was put into a milling vessel made of steel of which the inner volume is about  $50 \text{ cm}^3$ , where the amount of additive was 5 mol% to 300 mg of  $\text{LiNH}_2$ . And then, the ball milling was performed under 0.1 MPa  $\text{H}_2$  (>99.999%) atmosphere for 2 hours using a planetary ball mill apparatus (QM-3SP4). The ball-to-powder weight ratio was about 90:1. To minimize the temperature increment of the samples, the milling process was paused for 30 minutes every hour of milling. All the samples were handled in a glove box filled with purified Ar (>99.999%) to avoid an oxidation and hydration due to water. A weighed  $\text{MNH}_2$  ( $\text{LiNH}_2$ ,  $\text{KNH}_2$ ,  $\text{KNH}_2$ -doped  $\text{LiNH}_2$ , KH-doped  $\text{LiNH}_2$ , and  $\text{KLi}_3(\text{NH}_2)_4$ ) was treated under 0.5 MPa of  $\text{H}_2$  flow at the designed temperatures with a heating rate of  $5^\circ\text{C}/\text{minute}$  to examine the reactivities. The reaction yield is calculated according to the equation  $Y_{\text{MH}} = M_{\text{MH}}/M_{\text{MNH}_2}$ , where  $Y_{\text{MH}}$ ,  $M_{\text{MH}}$ , and  $M_{\text{MNH}_2}$  present the reaction yield, the mass of MH produced, and the initial mass of  $\text{MNH}_2$ , respectively. The sample masses before and after the experiments were measured to calculate  $M_{\text{MH}}$  and  $M_{\text{MNH}_2}$ . The structural characters of the produced composites were examined by X-ray diffraction (XRD) measurements.

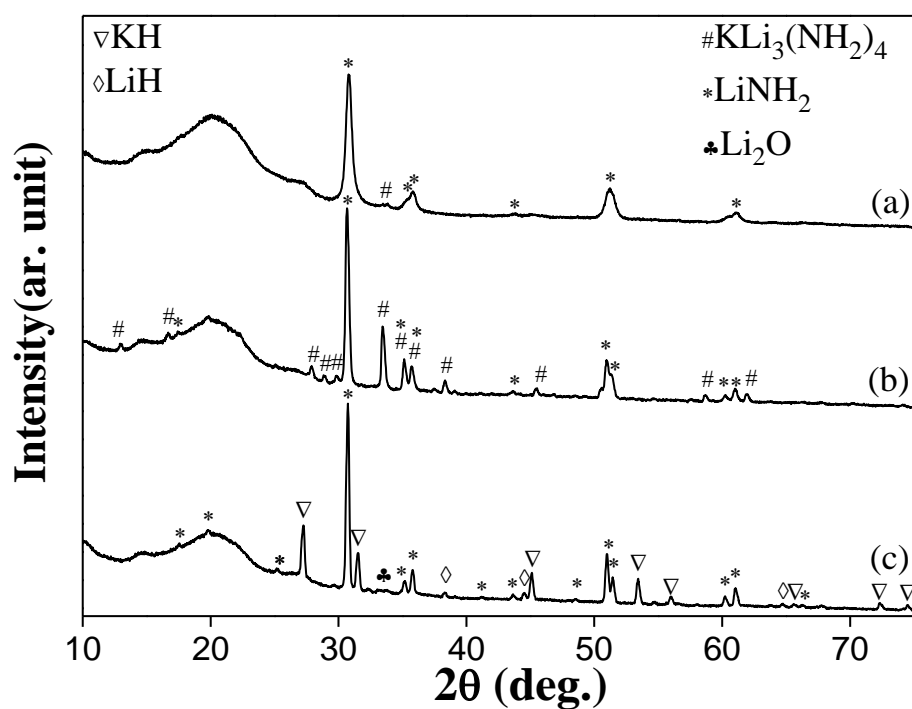

Fig. S1: XRD patterns of the 5 mol% KH-doped  $\text{LiNH}_2$  after ball milling (a) and treatment under Ar (b) and  $\text{H}_2$  (c) flow condition at  $200^\circ\text{C}$  for 4 hours.

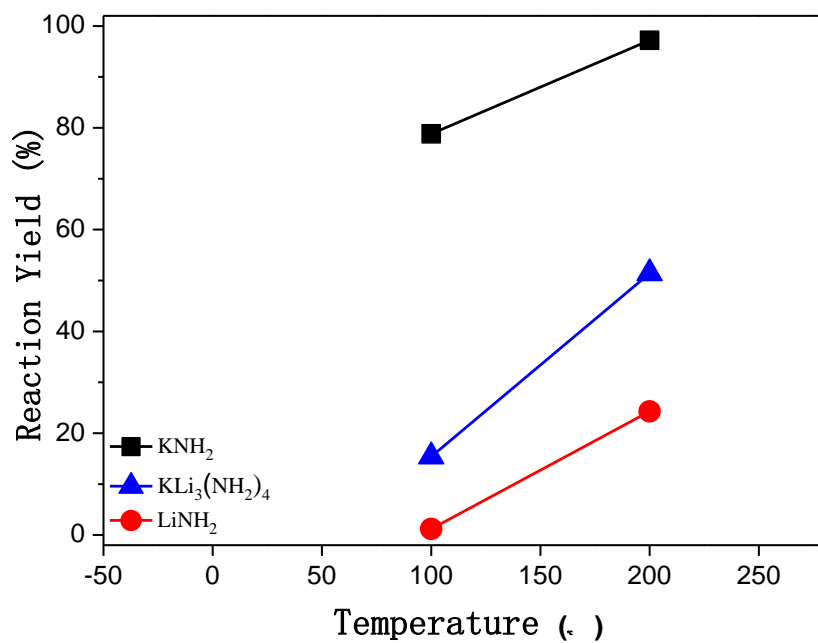

Fig. S2: Reaction yield of the reaction between  $M\text{NH}_2$  ( $M = \text{Li or K}$ ) and  $\text{H}_2$  at different temperatures for 4 hours.

Reaction Equation S1: The hydrogenation mechanism of the KH-doped LiNH<sub>2</sub> system.

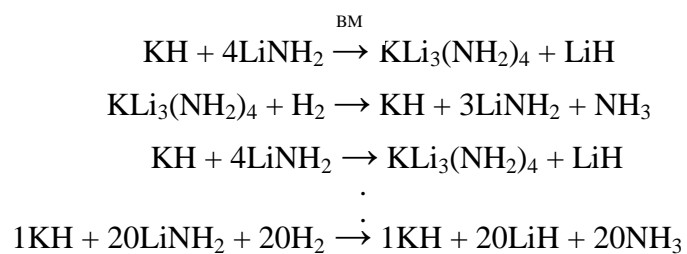

Supplement: c3ra40198g.pdf [file c3ra40198g.pdf]
